# Supplementary material
Source: Research Square preprint supplement (doi:10.21203/rs.3.rs-9584045/v1)
Supplement: Supplementary file 1 [file 0899d094bdfe653aa5081229.docx]

**Supplementary materials**

**Appendix III: KII Guide for DHMT Members**

1. **General Information**
2. Name of Research Assistant: ___________________________
3. Date of Interview: ____ / ____ / ________
4. Name of Respondent: ___________________________________
5. Department: ___________________________________
6. Position/Role of Respondent: ___________________________________
7. Gender of Respondent:

☐ Male

☐ Female

1. **Relevance and Design:**

THIS SECTION EXPLORES THE RELEVANCE AND APPROPRIATENESS OF THE DIRECT FACILITY FINANCING (DFF) PROGRAMME IN ADDRESSING THE PRIORITY NEEDS AND CHALLENGES FACED BY HEALTH FACILITIES AND THEIR CATCHMENT POPULATIONS. IT FURTHER ASSESSES YOUR PERCEPTIONS REGARDING THE DESIGN OF THE PROGRAMME, COMMUNITY PARTICIPATION, AND PRIORITY-SETTING PROCESSES AT THE FACILITY LEVEL.

1. To what extent do the overall objectives of the DFF programme still align with the immediate needs and priorities of the participating facilities/catchment populations?

**Probe:** Please explain how this compares with the status quo in the health sector.

1. In what ways did the DFF design take into account the unique needs and characteristics of different types of health facilities (such as community hospitals, health centres, and dispensaries) during the implementation phase?
2. To what extent did the District Council/DHMT sufficiently train and capacitate the HCMC members and other facility stakeholders?

**Probes:**

1. To what extent were the training programs tailored to address the specific skills and knowledge gaps among the HCMC?
2. Were the trainings sufficient to meet the needs and expectations? Why or why not?
3. To what extent did the DHMT conduct monitoring and supervision visits to the facilities as planned? (Note: Ask how often)

**Probes:**

1. Were the monitoring and supervision visits sufficient to meet the needs and expectations of the DFF?
2. How was the feedback from these visits integrated into the programme design? Please explain.
3. To what extent were the budget allocations for DFF activities adequate to support the priority needs identified at the health facilities?
4. In your view, how relevant and appropriate/suitable was the overall design of the DFF programme in achieving its intended outputs? Please explain.

**Probe:** Are there any recommendations you would suggest to improve the DFF programme design?

1. **Project Efficiency (Processes):**

THIS SECTION EXAMINES THE EXTENT TO WHICH THE DFF PROGRAMME CONTRIBUTED TO IMPROVEMENTS IN HEALTH SERVICE DELIVERY, HEALTHCARE QUALITY, COMMUNITY PARTICIPATION, AND FACILITY-LEVEL AUTONOMY IN PLANNING, BUDGETING, AND DECISION-MAKING. IT ALSO EXPLORES PERCEIVED CHANGES RESULTING FROM THE IMPLEMENTATION OF THE PROGRAMME.

1. To what extent were the planned DFF activities executed according to the agreed-upon timelines and budget?
2. Have there been any notable challenges in the disbursement of funds for DFF initiatives? If so, what were the primary challenges encountered, and how were they mitigated?
3. From your perspective, how well were the allocated financial resources managed and utilized for DFF activities? Please explain.
4. Were there any measures in place to uphold transparency and accountability in financial management at the participating facilities? Please explain.
5. What mechanisms (if any) were put in place to track expenditures at the participating facilities? How effective have they been?

**Probe:** What role did the District Council play in overseeing these mechanisms?

1. **Project Effectiveness:**

THIS SECTION SEEKS TO GAUGE THE EXTENT TO WHICH THE OBJECTIVES OF THE DFF PROGRAM HAVE BEEN ACHIEVED; AND HOW WELL PROGRAM’S ACTIVITIES CONTRIBUTE TO THE ACHIEVEMENT OF PROGRAMME’S OBJECTIVES. IT ALSO SEEKS TO ASSESS THE PERCEIVED EFFECTS OF THE DFFINCLUDING THE POSITIVE AND NEGATIVE CHANGES PRODUCED BY THE DFF (DIRECTLY OR INDIRECTLY, INTENDED OR UNINTENDED).

1. To what extent have the intended outputs of the DFF programme been achieved within the designated timeframe?

**Probes:**

a. What factors have contributed to the progress or delay in achieving the desired outputs of the DFF programme at the participating facilities?

b. If there were delays, how were they addressed?

1. Were there any notable differences in outputs across different facilities? Please explain and, if possible, provide examples.
2. Can you identify any successful practices or experiences from the pilot phase that have demonstrated effectiveness and could be replicated during national scale-up?

**Probe:** What do you suggest should have been done differently to improve DFF programme performance?

1. To what extent did the DFF programme (funds) address the immediate needs of the participating health facilities?

**Probe:** Please explain how this compares with before the project was implemented.

1. How did the DFF programme contribute to the overall health service delivery initiatives in the participating facilities?

**Probes:**

a. How has the DFF programme contributed to enhancing healthcare access and quality within the participating facilities?

b. Please explain how this compares with before the project was implemented.

1. Since the implementation of DFF, has there been any noticeable changes in the following:

a. Facility autonomy? (PLEASE EXPLAIN HOW IT WAS BEFORE THE PROGRAMME AND AFTER THE PROGRAMME).

b. Community oversight? (PLEASE EXPLAIN HOW IT WAS BEFORE THE PROGRAMME AND AFTER THE PROGRAMME).

1. **Project Sustainability:**

THIS SECTION ASSESSES THE LIKELIHOOD THAT THE BENEFITS AND SYSTEMS INTRODUCED THROUGH THE DFF PROGRAMME WILL BE SUSTAINED OVER TIME. PARTICULAR ATTENTION IS GIVEN TO INSTITUTIONALISATION, LOCAL OWNERSHIP, CAPACITY STRENGTHENING, AND MEASURES PUT IN PLACE TO SUPPORT LONG-TERM CONTINUITY OF PROGRAMME GAINS.

1. To what extent is the DFF programme integrated into the institutional structures and policies at the district and national levels to ensure its sustainability?

**Probe:** What would you recommend to promote integration of the DFF programme into institutional structures and policies at district and national levels?

1. To what extent has the DFF programme strengthened the institutional capacity of health facilities and communities to sustain good financial management practices?
2. To what extent did the project activities promote local ownership and capacity building?
3. **Recommendations:**

THIS SECTION PROVIDES RESPONDENTS WITH AN OPPORTUNITY TO SHARE RECOMMENDATIONS FOR STRENGTHENING, IMPROVING, AND SCALING UP THE DFF PROGRAMME BASED ON THEIR IMPLEMENTATION EXPERIENCES AND OBSERVATIONS AT THE FACILITY LEVEL.

1. What are the general challenges that were faced during implementation of the DFF programme?
2. What recommendations would you suggest to enhance the success of the DFF programme?
