# Supplementary material
Source: Research Square preprint supplement (doi:10.21203/rs.3.rs-9584045/v1)
Supplement: Supplementary file 2 [file 15ea95b41cd7c2b744ce763b.docx]

**Supplementary materials**

**Appendix I: KII Guide for Facility Staff**

1. **General Information**
2. Name of research assistant: ___________________________
3. Date of interview: ____ / ____ / ________
4. Name of health facility: ___________________________
5. Facility ownership:

☐ Government Facility

☐ CHAM Facility

1. Position/Role of respondent: ___________________________
2. Gender of respondent:

☐ Male

☐ Female

1. Respondent’s total years of experience: ___________________
2. **Relevance and Design:**

THIS SECTION EXPLORES THE RELEVANCE AND APPROPRIATENESS OF THE DIRECT FACILITY FINANCING (DFF) PROGRAMME IN ADDRESSING THE PRIORITY NEEDS AND CHALLENGES FACED BY HEALTH FACILITIES AND THEIR CATCHMENT POPULATIONS. IT FURTHER ASSESSES YOUR PERCEPTIONS REGARDING THE DESIGN OF THE PROGRAMME, COMMUNITY PARTICIPATION, AND PRIORITY-SETTING PROCESSES AT THE FACILITY LEVEL.

1. To what extent did the DFF programme/activities align with the immediate needs and priorities of your health facility's catchment population? Please explain.

Probes:

- - 1. Did the DFF resolve the immediate needs/challenges faced by your health facility?
    2. Please explain how does this compares with before the project was implemented?

1. How did the training activities provided under the DFF programme address the specific skills and knowledge gaps at your health facility?
2. How actively did health facility staff and community members participate in the implementation of DFF activities? What modes of participation occurred?
3. What activities did you include in your facility workplan for the DFF?

Probes:

1. Were the budget allocations for DFF activities adequate to support the priority needs identified at your health facility?
2. Which activities were allocated/not allocated adequate resources? Please clarify.
3. In your view, how relevant and appropriate/suitable was the overall design of the DFF programme in achieving its intended outcomes at your facility? Please explain.

Probes:

- 1. Are there any recommendations you would suggest to help us improve on the DFF programme design?
  2. How would you rate the overall design?

☐ Very Negative

☐ Negative

☐ Positive but with challenges

☐ Positive

☐ Very Positive

1. **Project Efficiency (Processes):**

THIS SECTION EXAMINES THE EXTENT TO WHICH THE DFF PROGRAMME CONTRIBUTED TO IMPROVEMENTS IN HEALTH SERVICE DELIVERY, HEALTHCARE QUALITY, COMMUNITY PARTICIPATION, AND FACILITY-LEVEL AUTONOMY IN PLANNING, BUDGETING, AND DECISION-MAKING. IT ALSO EXPLORES PERCEIVED CHANGES RESULTING FROM THE IMPLEMENTATION OF THE PROGRAMME.

1. Were the planned DFF activities implemented as scheduled and with the allocated financial resources at your health facility?
2. Were there any delays or inefficiencies in the fund’s disbursement process to your health facility? If yes, probe:
3. what challenges were encountered?
4. were they resolved?
5. how were they resolved?
6. To what extent were the financial and technical resources utilized to achieve the desired outputs during the pilot phase at your health facility?
7. Were there any measures in place to uphold transparency and accountability in financial management at the facilities? Please explain.
   - 1. Probe: How was monitoring and reporting conducted at the facility?
8. What strategies were implemented within the DFF programme at your health facility to maximize efficiency in resource utilization?
9. Based on your assessment, what recommendations would you make to improve the efficiency of the DFF programme at your health facility moving forward?
10. **Project Effectiveness:**

THIS SECTION SEEKS TO GAUGE THE EXTENT TO WHICH THE OBJECTIVES OF THE DFF PROGRAM HAVE BEEN ACHIEVED; AND HOW WELL PROGRAM’S ACTIVITIES CONTRIBUTE TO THE ACHIEVEMENT OF PROGRAMME’S OBJECTIVES. IT ALSO SEEKS TO ASSESS THE PERCEIVED EFFECTS OF THE DFFINCLUDING THE POSITIVE AND NEGATIVE CHANGES PRODUCED BY THE DFF (DIRECTLY OR INDIRECTLY, INTENDED OR UNINTENDED).

1. How well have the target outputs been achieved within the specified timeframe at your health facility?
2. What factors contributed to the progress or delay in achieving the intended results?
3. How would you rate the overall performance of the interventions and results achieved during the DFF implementation?
   - - 1. What do you suggest should have been done differently to improve DFF programme performance?
4. What good practices or successful experiences from the pilot phase that could be replicated during scaling up at your health facility?
5. Were there any unintended positive or negative results realized from the implementation of the DFF project at your health facility? Please explain.
6. To what extent did the DFF programme (funds) successfully address the immediate needs of your facility?
   - 1. Please explain how does this compares with before the project was implemented?
7. How did the DFF Programme contribute to the overall health service delivery initiatives at your facility?
   - 1. How has the DFF programme contributed to enhancing healthcare access and quality at the facility?
8. To what extent has the DFF programme fostered community oversight and engagement in the facility decision-making processes? Please explain.
9. To what extent did the DFF programme facilitate health facility autonomy in resource management and allocation at your health facility? Please explain.
10. **Project Sustainability:**

THIS SECTION ASSESSES THE LIKELIHOOD THAT THE BENEFITS AND SYSTEMS INTRODUCED THROUGH THE DFF PROGRAMME WILL BE SUSTAINED OVER TIME. PARTICULAR ATTENTION IS GIVEN TO INSTITUTIONALISATION, LOCAL OWNERSHIP, CAPACITY STRENGTHENING, AND MEASURES PUT IN PLACE TO SUPPORT LONG-TERM CONTINUITY OF PROGRAMME GAINS.

1. How well is the DFF embedded in the institutional structures that will ensure its sustainability at your health facility?
2. To what extent has the DFF programme strengthened your health facility's institutional capacity to sustain improved financial management practices?
3. To what extent did the DFF programme activities promote local ownership and capacity building at your health facility to ensure long-term sustainability? Please explain.
4. What measures were put in place to ensure the long-term sustainability of the project outcomes at your health facility?
5. What recommendations can be made to enhance the sustainability of DFF in the long term at your health facility?
6. **Project Recommendations:**

THIS SECTION PROVIDES RESPONDENTS WITH AN OPPORTUNITY TO SHARE RECOMMENDATIONS FOR STRENGTHENING, IMPROVING, AND SCALING UP THE DFF PROGRAMME BASED ON THEIR IMPLEMENTATION EXPERIENCES AND OBSERVATIONS AT THE FACILITY LEVEL.

1. Please provide your recommendations for the DFF programme and for future projects based on your experience at your health facility.
