# Supplementary material
Source: Research Square preprint supplement (doi:10.21203/rs.3.rs-9584045/v1)
Supplement: Supplementary file 3 [file 375013da468176ff8b737695.docx]

**Supplementary materials**

**Appendix IV: KII Guide for DFF Taskforce Members (MoH, CHAI & UNICEF)**

1. **General Information**
2. Name of research assistant: ___________________________
3. Date of interview: ____ / ____ / ________
4. Institution/Department: ___________________________
5. Position/Role of respondent: ___________________________
6. Gender of respondent:

☐ Male

☐ Female

1. **Relevance and Design:**

THIS SECTION EXPLORES THE RELEVANCE AND APPROPRIATENESS OF THE DIRECT FACILITY FINANCING (DFF) PROGRAMME IN ADDRESSING THE PRIORITY NEEDS AND CHALLENGES FACED BY HEALTH FACILITIES AND THEIR CATCHMENT POPULATIONS. IT FURTHER ASSESSES YOUR PERCEPTIONS REGARDING THE DESIGN OF THE PROGRAMME, COMMUNITY PARTICIPATION, AND PRIORITY-SETTING PROCESSES AT THE FACILITY LEVEL.

1. To what extent are the DFF program objectives still valid?
2. To what extent was the DFF designed to respond to the needs and priorities of the target (catchment) population in the pilot district (Rumphi)?
   1. **Probe:** How well did the project activities align with the needs of the target communities or health facilities?
3. Were the unique needs of different types of health facilities (such as community hospitals, health centres) taken into account during implementation of the DFF?
4. Are the DFF program’s objectives and outcomes consistent and supportive of the national health policies and priorities? Please explain.
5. Were the training programs designed to address the specific skills and knowledge gap? Please explain?
6. Did the budgeting for funds adequately support the identified priority needs?
7. Was the initial design of the DFF program appropriate for achieving its intended outcomes, considering the specific context of each health facility? Please explain.
8. Have there been any modifications to the initial design of the DFF program during implementation? If so, have these changes resulted in significant improvements in program design?
9. To what extent were coordination mechanisms between the Ministry of Health, Implementing Partners, and the participating health facilities clearly defined?
   1. **Probe:** How have they supported the strengthening of institutional capacity and community ownership and oversight within the program?
10. **Project Efficiency (Processes):**

THIS SECTION EXAMINES THE EXTENT TO WHICH THE DFF PROGRAMME CONTRIBUTED TO IMPROVEMENTS IN HEALTH SERVICE DELIVERY, HEALTHCARE QUALITY, COMMUNITY PARTICIPATION, AND FACILITY-LEVEL AUTONOMY IN PLANNING, BUDGETING, AND DECISION-MAKING. IT ALSO EXPLORES PERCEIVED CHANGES RESULTING FROM THE IMPLEMENTATION OF THE PROGRAMME.

1. To what extent were the planned DFF activities implemented as scheduled and with the planned financial resources?
2. Since DFF pilot was implemented, how much funding has been allocated to implement different activities/project components?
3. Were there any delays or inefficiencies in the disbursement process? If yes, what challenges did you face? (Probe)
4. Were there any cost-saving measures adopted during the project implementation? Please explain.
5. Were there any systems put in place to monitor and report performance of the DFF? Please explain how monitoring and reporting done.
6. How effectively have the inputs (e.g., financial resources, in-kind support, and technical assistance) been utilized to achieve the desired outputs during the pilot phase?
7. Have there been instances of duplication of efforts during the DFF program implementation?
8. Can you identify any alternative approaches that could have been employed to achieve the same outputs? If so, how do these approaches compare in terms of efficiency?
9. What strategies have been implemented within the DFF program to maximize resource utilization and enhance efficiency?
10. Have there been any instances within the DFF program where alternative approaches were considered and implemented to improve efficiency? If so, what were the outcomes of these adjustments?
11. How do the outputs achieved through the DFF program compare to those of alternative funding/resource flow in terms of efficiency?
12. How does the performance of different participating facilities under the DFF program compare in terms of efficiency in achieving desired outputs?
13. Based on your assessment, what recommendations would you make to improve the efficiency of the DFF program moving forward?
14. **Project Effectiveness:**

THIS SECTION SEEKS TO GAUGE THE EXTENT TO WHICH THE OBJECTIVES OF THE DFF PROGRAM HAVE BEEN ACHIEVED; AND HOW WELL PROGRAM’S ACTIVITIES CONTRIBUTE TO THE ACHIEVEMENT OF PROGRAMME’S OBJECTIVES. IT ALSO SEEKS TO ASSESS THE PERCEIVED EFFECTS OF THE DFFINCLUDING THE POSITIVE AND NEGATIVE CHANGES PRODUCED BY THE DFF (DIRECTLY OR INDIRECTLY, INTENDED OR UNINTENDED).

1. How well have the target outputs been achieved within the specified timeframe?

**Probes:**

- 1. What factors have contributed to the progress or delay in achieving the intended results?
  2. Were there any differential results across the participating health facilities? Why?

1. What factors (internal and external) hindered or facilitated the implementation of the activities as well as the achievement of the results?
2. What good practices or successful experiences from the pilot phase be identified for replication during scaling up?
3. How would you rate the quality of interventions and results achieved in collaboration with key stakeholders?
4. To what extent have partnerships been formed and synergies created between the Ministry of Health and other stakeholders in implementing the DFF program? Please explain.
5. Were there any other unintended results both positive and negative realized from the implementation of the DFF project? Please explain.
6. In which areas has the DFF program had a significant impact on improving service delivery (if identifiable at this stage)?
7. Have there been any noticeable changes in facility autonomy following the implementation of the DFF program? Please explain.
8. How has the DFF program contributed to strengthening the capacity and flexibility of health facilities to respond to population needs? Please explain.
9. Have there been any noticeable changes in community oversight following the implementation of the DFF program? Please explain.
10. To what extent has the DFF program contributed to fostering community oversight and engagement in the facility decision-making processes? Please explain.
11. How does the DFF program contribute to enhancing healthcare access and quality within the participating facilities?
12. Are there any specific facilities that have benefitted the most from the DFF program? Please explain.
13. How effectively has the DFF program addressed cross-cutting issues such as community participation and involvement?
14. What external factors have influenced the delivery and outcomes of the DFF program, and how has the program responded to these challenges?
15. **Project Sustainability:**

THIS SECTION ASSESSES THE LIKELIHOOD THAT THE BENEFITS AND SYSTEMS INTRODUCED THROUGH THE DFF PROGRAMME WILL BE SUSTAINED OVER TIME. PARTICULAR ATTENTION IS GIVEN TO INSTITUTIONALISATION, LOCAL OWNERSHIP, CAPACITY STRENGTHENING, AND MEASURES PUT IN PLACE TO SUPPORT LONG-TERM CONTINUITY OF PROGRAMME GAINS.

1. How well is the DFF programme embedded within existing national and sub-national institutional structures and systems that will ensure its long-term sustainability?

**Probes:**

- 1. To what extent has DFF been integrated into routine Ministry of Health and District Council systems?
  2. Are there written guidelines, or frameworks supporting institutionalisation of DFF?
  3. Which institutional structures are currently responsible for overseeing DFF implementation and accountability?

1. To what extent has the DFF programme strengthened the institutional capacity of health facilities, district councils, and communities to sustain improved financial management and governance practices?

**Probes:**

1. What specific capacities have been strengthened through the pilot?
2. Are these capacities likely to be sustained beyond donor or pilot support?
3. How has the pilot strengthened the capacity of project stakeholders (including facilities, district council, and communities) to recognise and respond to local population health needs?

To what extent did the pilot activities promote local ownership, participation, and accountability among health facilities and communities? Please explain.

**Probes:**

1. How actively were communities involved in planning and oversight?
2. To what extent do facilities feel ownership over DFF processes and resources?
3. How sufficient and predictable were the allocated financial resources in ensuring the sustainability and continuity of the DFF programme?

**Probes:**

- 1. Are current financing arrangements adequate for long-term implementation?
  2. What financing gaps or risks threaten sustainability?

1. Have any new partners, institutions, or stakeholders emerged during implementation that could support the long-term sustainability and scale-up of DFF?

**Probes:**

- 1. What roles are these partners expected to play?
  2. How important are development partners in sustaining DFF?

1. To what extent is there political commitment and political will at national and district levels to sustain and scale up the DFF programme? Please explain.

**Probes:**

- 1. How has political leadership supported or influenced DFF implementation?
  2. Have there been any political barriers or resistance affecting implementation?
  3. To what extent is DFF prioritised within national health financing reforms and government agendas?

1. What measures have been put in place to ensure the long-term sustainability and institutionalisation of DFF programme outcomes?

**Probes:**

1. Are there plans for continued government financing?
2. Have sustainability or transition plans been developed?
3. Are there mechanisms for ongoing monitoring, learning, and accountability?
4. What recommendations can be made to strengthen the sustainability, institutionalisation, and long-term scale-up of the DFF programme in Malawi?
5. **Key Lessons Learnt**

55. What has worked well and what did not work well in the implementation of the DFF project.

56. Please provide your recommendations for the DFF national scale-up and future projects.
