# Supplementary material
Source: Research Square preprint supplement (doi:10.21203/rs.3.rs-9584045/v1)
Supplement: Supplementary file 4 [file a157ff29bbc3c4024008e008.docx]

**Supplementary materials**

**Appendix II: FGD Guide for HCMC Members**

1. **General Information**
2. Name of research assistant: ___________________________
3. Date of interview: ____ / ____ / ________
4. Name of health facility: ___________________________
5. Facility ownership:

☐ Government Facility

☐ CHAM Facility

1. Position/Role of respondent: ___________________________
2. **Relevance and Design:**

THIS SECTION EXPLORES THE RELEVANCE AND APPROPRIATENESS OF THE DIRECT FACILITY FINANCING (DFF) PROGRAMME IN ADDRESSING THE PRIORITY NEEDS AND CHALLENGES FACED BY HEALTH FACILITIES AND THEIR CATCHMENT POPULATIONS. IT FURTHER ASSESSES YOUR PERCEPTIONS REGARDING THE DESIGN OF THE PROGRAMME, COMMUNITY PARTICIPATION, AND PRIORITY-SETTING PROCESSES AT THE FACILITY LEVEL.

1. Were the objectives of the DFF programme clearly communicated to the Health Centre Management Committee (HCMC)?
   1. In your opinion, how relevant do you find these objectives to the specific health needs and priorities of the health facility's catchment population?
2. To what extent did the HCMC receive the necessary training and capacity-building support to effectively carry out their duties under the DFF programme?
   1. Who provided the training/workshop?
   2. How long/often was the training/workshop for?
3. How well do you feel the training provided aligns with the duties expected of HCMC members?
4. How well did the allocated funds adequately support the priority needs identified by your health facility (including the HCMC)?
5. Were the coordination mechanisms between the facility management and the HCMC clearly defined?

a). How did these mechanisms support the strengthening of your health facility's institutional capacity and community ownership and oversight within the program?

1. **Project Efficiency (Processes):**

THIS SECTION EXAMINES THE EXTENT TO WHICH THE DFF PROGRAMME CONTRIBUTED TO IMPROVEMENTS IN HEALTH SERVICE DELIVERY, HEALTHCARE QUALITY, COMMUNITY PARTICIPATION, AND FACILITY-LEVEL AUTONOMY IN PLANNING, BUDGETING, AND DECISION-MAKING. IT ALSO EXPLORES PERCEIVED CHANGES RESULTING FROM THE IMPLEMENTATION OF THE PROGRAMME.

1. Were the planned DFF activities implemented as scheduled and with the allocated financial resources at your health facility? Please explain.
2. Were there any delays or inefficiencies in the disbursement of funds to your health facility? If yes, what challenges were encountered?
3. How actively did community members participate in the implementation of DFF activities? What modes of participation occurred?
4. Are there any identified gaps or challenges in the implementation of facility plans and budgets by the HCMC?
   1. How are these addressed to ensure timely and effective service delivery within health facilities?
5. How would you rate the effectiveness of communication and coordination between the HCMC and other health structures?
6. **Project Effectiveness:**

THIS SECTION SEEKS TO GAUGE THE EXTENT TO WHICH THE OBJECTIVES OF THE DFF PROGRAM HAVE BEEN ACHIEVED; AND HOW WELL PROGRAM’S ACTIVITIES CONTRIBUTE TO THE ACHIEVEMENT OF PROGRAMME’S OBJECTIVES. IT ALSO SEEKS TO ASSESS THE PERCEIVED EFFECTS OF THE DFFINCLUDING THE POSITIVE AND NEGATIVE CHANGES PRODUCED BY THE DFF (DIRECTLY OR INDIRECTLY, INTENDED OR UNINTENDED).

1. To what extent have the efforts of the HCMC led to increased utilization of health services and strengthened community engagement? Please explain.
2. In your opinion, what internal and external factors hindered or facilitated the implementation of activities and the achievement of results at your health facility?
3. How effectively did the HCMC fulfill its role in identifying and prioritizing facility expenditure items to address health facility needs and priorities?
4. To what extent did the HCMC actively engage with health facility management and staff in the planning, budget formulation, execution, and evaluation processes under the DFF program? Please explain.
5. In your view, what are the key success factors that contribute to the effectiveness of the HCMC in implementing its roles and responsibilities within the DFF program? How can these be further enhanced?
6. Has the DFF programme contributed to strengthening your health facility's capacity and flexibility to respond to population needs? Please explain.
7. To what extent has the DFF programme fostered community oversight and engagement in the facility decision-making processes? Please explain.
8. **Project Sustainability:**

THIS SECTION ASSESSES THE LIKELIHOOD THAT THE BENEFITS AND SYSTEMS INTRODUCED THROUGH THE DFF PROGRAMME WILL BE SUSTAINED OVER TIME. PARTICULAR ATTENTION IS GIVEN TO INSTITUTIONALISATION, LOCAL OWNERSHIP, CAPACITY STRENGTHENING, AND MEASURES PUT IN PLACE TO SUPPORT LONG-TERM CONTINUITY OF PROGRAMME GAINS.

1. How has the project strengthened the capacity of the HCMC to recognize and respond to population needs?
2. To what extent has the DFF programme strengthened your capacity to sustain facility financial management oversight? Please explain.
3. What measures are put in place to ensure that HCMC’s collaboration with other health structures (e.g., health management team) remains strong and effective in the future?
4. To what extent did the programme activities promote local ownership and capacity building at your health facility?
5. How sufficient were the allocated funds to ensure the sustainability of the DFF programme at your health facility?
6. **Project Recommendations:**

THIS SECTION PROVIDES RESPONDENTS WITH AN OPPORTUNITY TO SHARE RECOMMENDATIONS FOR STRENGTHENING, IMPROVING, AND SCALING UP THE DFF PROGRAMME BASED ON THEIR IMPLEMENTATION EXPERIENCES AND OBSERVATIONS AT THE FACILITY LEVEL.

1. Please provide your recommendations for the DFF programme and for future projects based on your experience at your health facility.
